# Supplementary material
Source: Springer Nature journal article supplement (https://www.springermedizin.de/resource/supplementary/13014_2012_820_MOESM1_ESM.pdf/9634806)

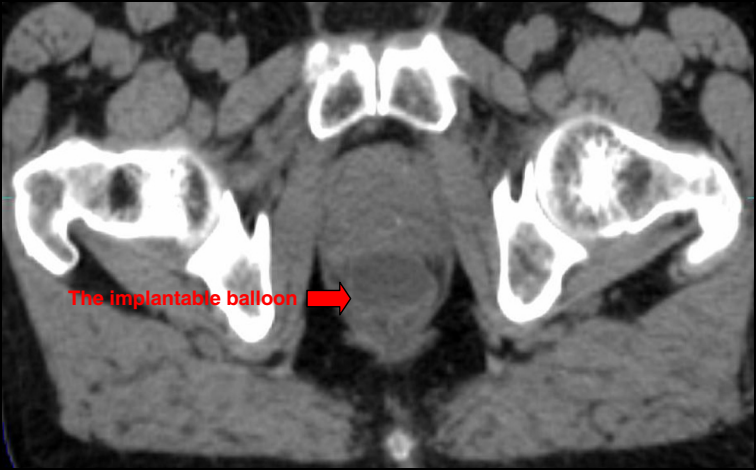

The implantable balloon →

Supplement: MOESM1 [file 9634806]
